# Supplementary material for: Transfer RNA-Derived Fragments and isomiRs Are Novel Components of Chronic TBI-Induced Neuropathology
Source: MDPI journal article supplement (doi:10.3390/biomedicines10010136), 2022-01-08
Supplement: s1 [file s1]

# Supplementary Data

## Supplementary methods

### Quantitative RT-PCR analysis of canonical miR-146a

Total RNA was translated to complimentary DNA (cDNA) with a TaqMan miRNA Reverse Transcriptase Kit (#4366596, Applied Biosystems, Foster City, CA, <http://www.appliedbiosystems.com>), according to the manufacturer's instructions. RT primer for miR-146a-5p (002163, Applied Biosystems) was used. RT was performed using a T100™ Thermal Cycler (Bio-Rad Laboratories Inc, Hercules, CA, USA) as follows: 16°C for 30 min, 42°C for 30 min, 85°C for 5 min, and 4°C thereafter. U6 snRNA (snRNA U6, 001973, Applied Biosystems) was used as an endogenous control. RT-qPCR using the TaqMan Small RNA Assays protocol (Applied Biosystems, <http://www.appliedbiosystems.com>) was used. Briefly, TaqMan Small RNA Assay (20x, miR-146a-5p (002163, GAGAACTGAATTCCATGGGTT, Applied Biosystems, or snRNA U6, 001973, GTGCTCGCTTCGGCAGCACATATACTAAAATTGGAACGATACAGAGAAGATTAGCATGGCCCCTGCGCAAG GATGACACGCAAATTCGTGAAGCGTTCCATATTTT, Applied Biosystems) was mixed with 1.33 µl of RT product, TaqMan Universal PCR Master Mix II with no UNG, and nuclease-free water (Ambion, AM9938, Thermo Fisher Scientific, Waltham, MA, USA) according to manufacturer's instructions. RT-qPCR was run using the StepOnePlus™ Real-Time PCR System (Software v2.1, Applied Biosystems) with a standard program: 50°C for 2 min, 95°C for 10 min, followed by 40 cycles (15 s each) at 95°C, and finally, at 60°C for 60 s. Every sample was run in triplicate. No template water control was added to the run. Ct values were normalized relative to snRNA U6 with the formula  $2^{-\Delta Ct}$ <sup>1</sup>.

1. Livak, K. J. & Schmittgen, T. D. Analysis of Relative Gene Expression Data Using Real-Time Quantitative PCR and the  $2^{-\Delta\Delta Ct}$  Method. *Methods* **25**, 402–408 (2001).

**Supplementary Figures**

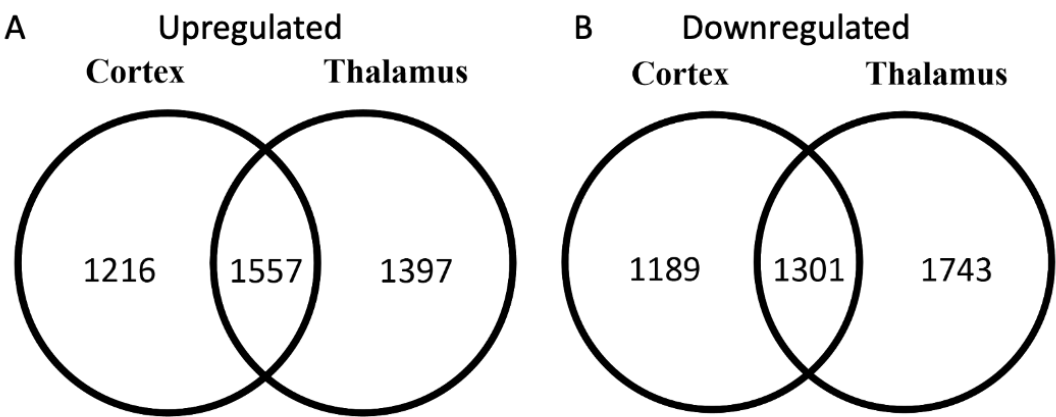

**Supplementary Figure S1.** Number of upregulated (A) and downregulated (B) genes in the perilesional cortex and ipsilateral thalamus.

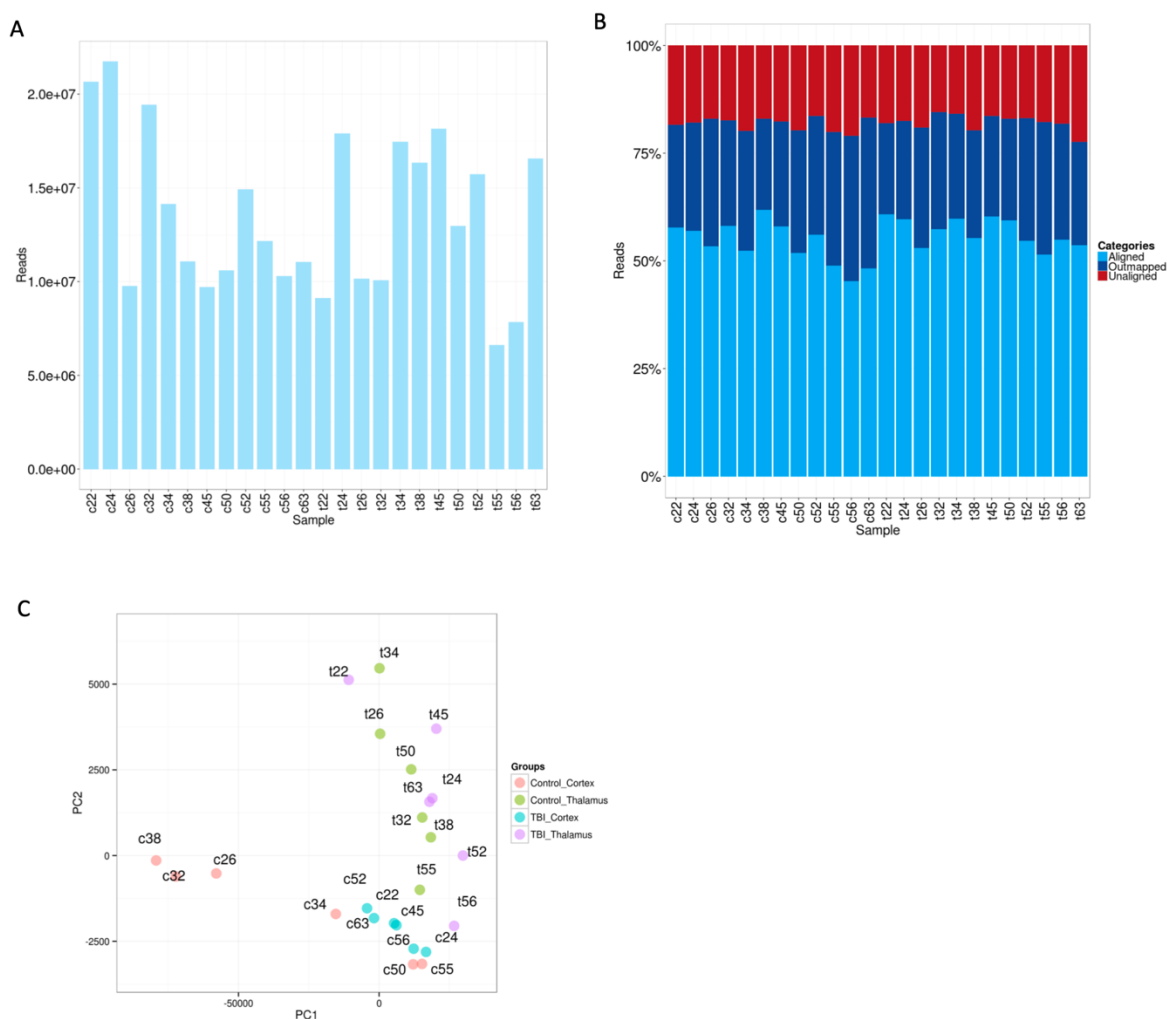

**Supplementary Figure S2.** Mapping of the small non-coding RNA sequencing reads. (A) On average, 13.5 million reads were obtained per sample. The figure below shows the total number of reads per sample. (B) The plot shows that the fraction of mappable reads (=counts) is within the normal range and the distribution is similar for all samples. A typical microRNA sequencing experiment yields approximately 40%–60% microRNAs mapping to the reference genome. (C) Principal component analysis (PCA) plot. The PCA was performed on all using top 50 microRNAs with the highest coefficient of variation (based on TPM normalized reads).

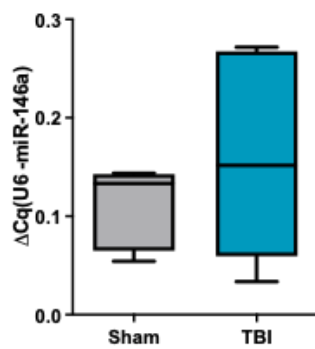

**Supplementary Figure S3.** Quantitative RT-PCR analysis of miR-146a did not reveal significant upregulation (FC=1.4,  $p>0.05$ ).

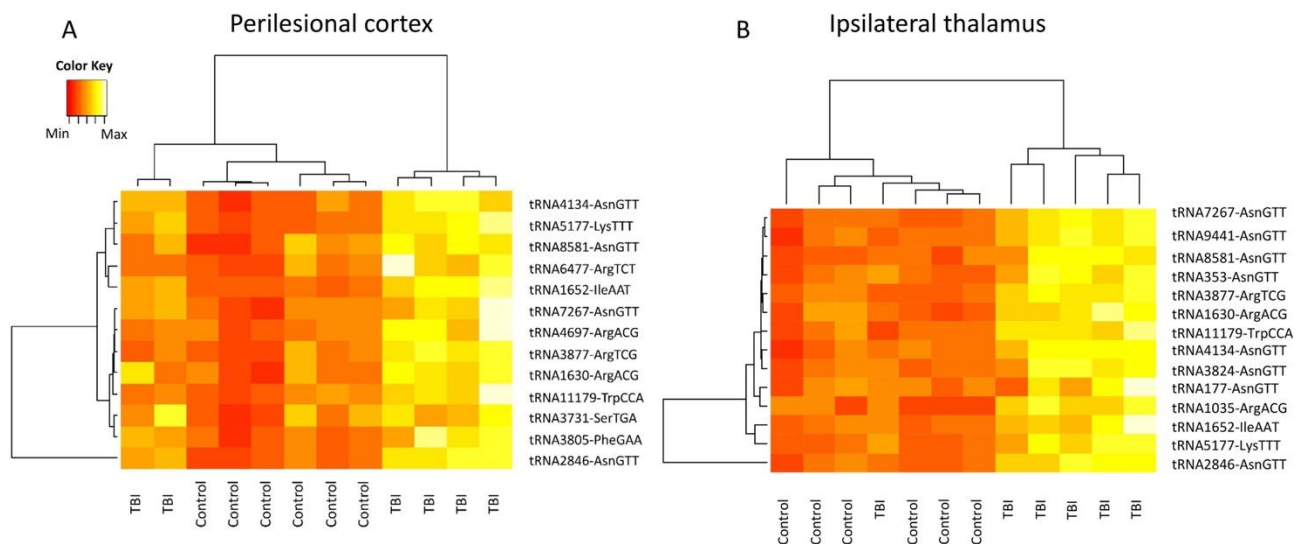

**Supplementary Figure S4.** Unsupervised hierarchical clustering of differentially expressed transfer RNA fragments (FDR>0.05) after traumatic brain injury in the perilesional cortex (A) and ipsilateral thalamus (B). Abbreviations: Asn, asparagine; Arg, arginine; Ile, isoleucine; Lys, lysine; Phe, phenylalanine; Ser, serine; Trp, tryptophan.

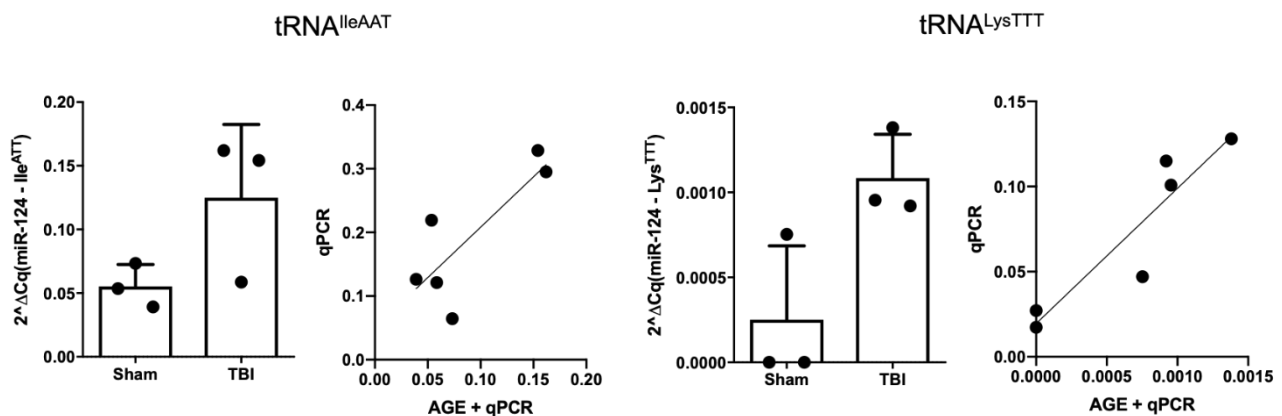

**Supplementary Figure S5.** Agarose gel electrophoresis to separate 20–50 nucleotide (nt) long small RNA from the total RNA pool. (A) When only 20–50nt long RNA was selected after the size separation of cortical RNA samples and before RT-qPCR, an upregulated profile of 3'tRF-Ile<sup>AAT</sup> (2.1,  $p>0.05$ ,  $n=3$  per group) was observed. (B) Analysis indicated a moderate correlation, meaning that the higher the expression in the total RNA sample, the greater the amount of 3'tRF detected after the size separation (Spearman  $r=0.54$ ,  $p>0.05$ ). (C) Similar analysis showed more 3'tRF-Lys<sup>TTT</sup> (3.3,  $p>0.05$ ,  $n=3$  per group) in post-TBI samples compared with sham-operated controls. (D) Analysis indicated moderate correlation, meaning that the higher the expression in the total RNA sample, the greater the amount of 3'tRF detected after the size separation (Spearman  $r=0.75$ ,  $p>0.05$ ).

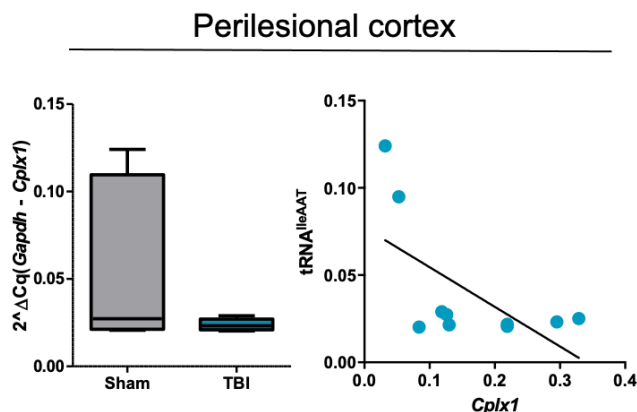

**Supplementary Figure S6.** Gene expression of *Cplx1* showed a trend toward downregulation in the perilesional cortex (FC=0.4,  $p>0.05$ ). No clear correlation was observed between 3'tRF-Ile<sup>AAT</sup> and *Cplx1* (Spearman  $r=0.38$ ,  $p>0.05$ ;  $n=5$  per group).

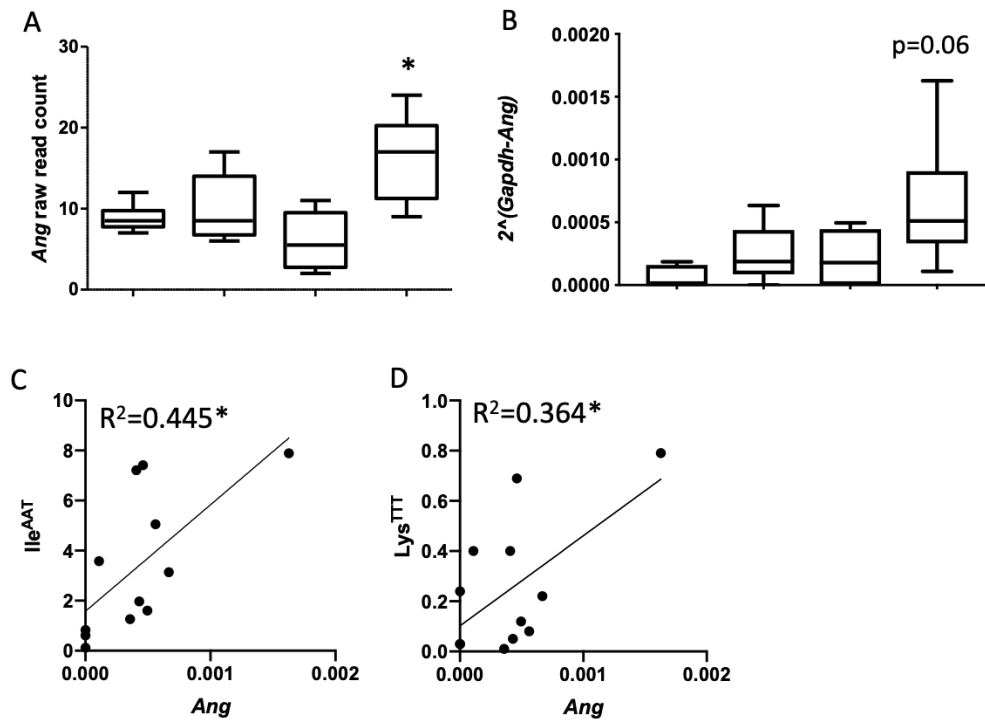

**Supplementary Figure S7.** Expression of angiogenin (ANG) after experimental traumatic brain injury. (A) ANG was upregulated in the ipsilateral thalamus (Log2FC=0.47, FDR<0.01) but not in the perilesional cortex (FDR>0.05). (B) Quantitative RT-PCR showed a trend toward upregulation in both the perilesional cortex (FC=1.26, p>0.05) and ipsilateral thalamus (FC=1.62, p<0.1), but the effect was not statistically significant. (C-D) A mild correlation between ANG and 3'tRFs (Spearman  $r=0.45$ ,  $p<0.05$  for 3'tRF-Ile<sup>AAT</sup> and Spearman  $r=0.36$ ,  $p<0.05$  for 3'tRF-Lys<sup>TTT</sup>) expression levels, however, was observed (panel C 3'tRF-Ile<sup>AAT</sup> and panel D for 3'tRF-Lys<sup>TTT</sup>) in the ipsilateral thalamus.

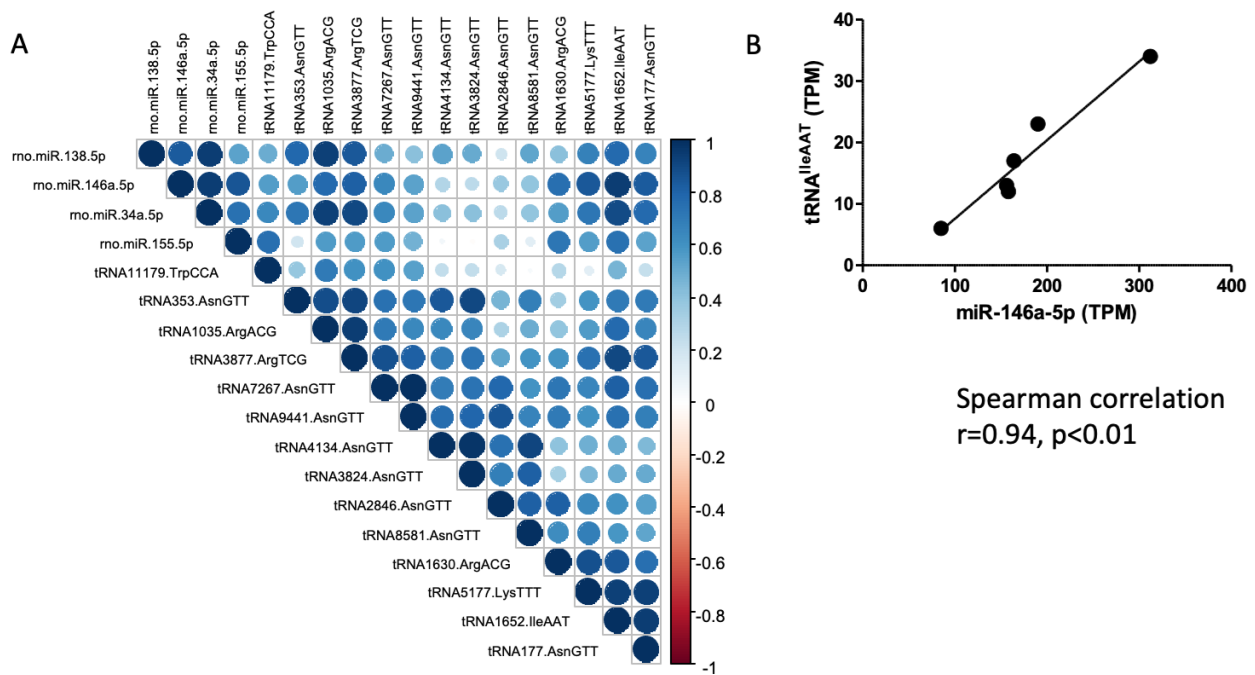

**Supplementary Figure S8.** Correlation between miR-146a, miR-155, and deregulated transfer RNA-derived fragments. (A) Correlation matrix reveals associations between small non-coding RNAs in the ipsilateral thalamus after traumatic brain injury. (B) Higher miR-146a indicates higher 3'tRF-Ile<sup>AAT</sup> (Spearman correlation  $r=0.94$ ,  $p<0.01$ ). Abbreviations: Asn, asparagine; Arg, arginine; Ile, isoleucine; Lys, lysine; Trp, tryptophan.

## Supplementary Tables

**Supplementary Table S1.** RIN integrity numbers prior the sequencing service and later PCR study.

|        | NANODROP<br>260/280 | AGILENT<br>RIN |
|--------|---------------------|----------------|
| THA22  | 2.05                | 9.00           |
| CX22   | 2.06                | 8.90           |
| THA24  | 2.05                | 9.20           |
| CX24   | 2.04                | 9.10           |
| THA45  | 2.10                | 9.00           |
| CX45   | 2.07                | 9.10           |
| THAA52 | 2.10                | 9.10           |
| CX52   | 2.10                | 9.20           |
| THA56  | 2.07                | 9.00           |
| CX56   | 2.08                | 9.10           |
| THA63  | 2.03                | 9.10           |
| CX63   | 2.08                | 9.00           |
| THA26  | 2,.9                | 9.00           |
| CX26   | 2.07                | 9.00           |
| THA32  | 2.01                | 9.20           |
| CX32   | 2.03                | 9.00           |
| THA34  | 2.05                | 9.20           |
| CX34   | 2.06                | 9.00           |
| THA38  | 2.04                | 9.10           |
| CX38   | 2.07                | 9.00           |
| THA50  | 2.07                | 9.10           |
| CX50   | 2.07                | 9.00           |
| THA55  | 2.07                | 9.10           |
| CX55   | 2.07                | 9.10           |

THA, thalamus

Cx, cortex



**Supplementary Table S2.** Quality control of messenger RNA sequencing.

| Sample | Total reads | Outmapped reads |                   | Mapped reads (%) | Unmappable reads (%) |
|--------|-------------|-----------------|-------------------|------------------|----------------------|
|        |             | rRNAs (%)       | Other (mtRNA) (%) |                  |                      |
| t38    | 52064186    | 0.064           | 11.623            | 86.356           | 1.943                |
| c50    | 47305296    | 0.11            | 12.34             | 85.695           | 1.838                |
| t45    | 46447521    | 0.117           | 8.741             | 89.307           | 1.823                |
| c45    | 57014336    | 0.237           | 9.052             | 88.796           | 1.905                |
| c22    | 60806193    | 0.496           | 10.627            | 86.997           | 1.866                |
| c63    | 42628454    | 0.135           | 10.468            | 87.416           | 1.966                |
| t50    | 49646919    | 0.115           | 10.662            | 87.425           | 1.784                |
| t22    | 47893172    | 0.154           | 9.354             | 88.674           | 1.81                 |
| c32    | 61980326    | 0.093           | 11.418            | 86.441           | 2.035                |
| t52    | 51412123    | 0.328           | 9.279             | 88.483           | 1.898                |
| t26    | 53182734    | 0.062           | 10.052            | 88.073           | 1.797                |
| t55    | 52517099    | 0.125           | 9.667             | 88.302           | 1.894                |
| t34    | 40716080    | 0.126           | 10.649            | 87.423           | 1.784                |
| t63    | 43744534    | 0.129           | 10.225            | 87.743           | 1.882                |
| c55    | 45937472    | 0.26            | 10.515            | 87.329           | 1.873                |
| c24    | 57106046    | 0.627           | 7.158             | 90.263           | 1.936                |
| t56    | 69906025    | 0.142           | 10.523            | 87.455           | 1.876                |
| t24    | 39066640    | 0.078           | 9.313             | 88.782           | 1.812                |
| t32    | 48955220    | 0.087           | 12.896            | 85.262           | 1.74                 |
| c38    | 45535090    | 0.119           | 11.764            | 86.257           | 1.85                 |
| c56    | 51794020    | 0.13            | 10.338            | 87.726           | 1.79                 |
| c52    | 60831605    | 0.316           | 10.519            | 87.277           | 1.872                |
| c34    | 55755093    | 0.426           | 11.969            | 85.754           | 1.839                |
| c26    | 48718370    | 0.248           | 11.713            | 86.271           | 1.761                |
