# Supplementary material for: Transfer RNA-Derived Fragments and isomiRs Are Novel Components of Chronic TBI-Induced Neuropathology
Source: Biomedicines. 2022 Jan 8;10(1):136. doi: 10.3390/biomedicines10010136 (PMC8773447; doi:10.3390/biomedicines10010136)
Supplement: Supplementary file 1 [file biomedicines-10-00136-s001.zip › Supplementary material S2.xlsx]

## Sheet: protein binding
GOTERM_MF_DIRECT: protein binding		Species
Gene_symbol	Gene name	Species
Dnmt3b	DNA methyltransferase 3 beta(Dnmt3b)	Rattus norvegicus
Gnat1	G protein subunit alpha transducin 1(Gnat1)	Rattus norvegicus
Rab10	RAB10, member RAS oncogene family(Rab10)	Rattus norvegicus
Rab3ip	RAB3A interacting protein(Rab3ip)	Rattus norvegicus
Rab3d	RAB3D, member RAS oncogene family(Rab3d)	Rattus norvegicus
Rapgef2	Rap guanine nucleotide exchange factor 2(Rapgef2)	Rattus norvegicus
Arhgef15	Rho guanine nucleotide exchange factor 15(Arhgef15)	Rattus norvegicus
Smad1	SMAD family member 1(Smad1)	Rattus norvegicus
Slk	STE20-like kinase(Slk)	Rattus norvegicus
Ceacam1	carcinoembryonic antigen related cell adhesion molecule 1(Ceacam1)	Rattus norvegicus
Chrnb2	cholinergic receptor nicotinic beta 2 subunit(Chrnb2)	Rattus norvegicus
Cntnap1	contactin associated protein 1(Cntnap1)	Rattus norvegicus
Drd1	dopamine receptor D1(Drd1)	Rattus norvegicus
Dag1	dystroglycan 1(Dag1)	Rattus norvegicus
Gpc1	glypican 1(Gpc1)	Rattus norvegicus
Hdac4	histone deacetylase 4(Hdac4)	Rattus norvegicus
Hap1	huntingtin-associated protein 1(Hap1)	Rattus norvegicus
Igf1r	insulin-like growth factor 1 receptor(Igf1r)	Rattus norvegicus
Itga7	integrin subunit alpha 7(Itga7)	Rattus norvegicus
Kif1a	kinesin family member 1A(Kif1a)	Rattus norvegicus
Mecp2	methyl CpG binding protein 2(Mecp2)	Rattus norvegicus
Mapt	microtubule-associated protein tau(Mapt)	Rattus norvegicus
Mef2d	myocyte enhancer factor 2D(Mef2d)	Rattus norvegicus
Npr1	natriuretic peptide receptor 1(Npr1)	Rattus norvegicus
Ncald	neurocalcin delta(Ncald)	Rattus norvegicus
Ncdn	neurochondrin(Ncdn)	Rattus norvegicus
Ntrk3	neurotrophic receptor tyrosine kinase 3(Ntrk3)	Rattus norvegicus
Nr4a3	nuclear receptor subfamily 4, group A, member 3(Nr4a3)	Rattus norvegicus
Nolc1	nucleolar and coiled-body phosphoprotein 1(Nolc1)	Rattus norvegicus
Ppib	peptidylprolyl isomerase B(Ppib)	Rattus norvegicus
Ppara	peroxisome proliferator activated receptor alpha(Ppara)	Rattus norvegicus
Pi4kb	phosphatidylinositol 4-kinase beta(Pi4kb)	Rattus norvegicus
Podxl	podocalyxin-like(Podxl)	Rattus norvegicus
Pabpc1	poly(A) binding protein, cytoplasmic 1(Pabpc1)	Rattus norvegicus
Kcnip4	potassium voltage-gated channel interacting protein 4(Kcnip4)	Rattus norvegicus
Kcnj11	potassium voltage-gated channel subfamily J member 11(Kcnj11)	Rattus norvegicus
Prkaca	protein kinase cAMP-activated catalytic subunit alpha(Prkaca)	Rattus norvegicus
Slc22a3	solute carrier family 22 member 3(Slc22a3)	Rattus norvegicus
Sorbs1	sorbin and SH3 domain containing 1(Sorbs1)	Rattus norvegicus
Sptbn2	spectrin, beta, non-erythrocytic 2(Sptbn2)	Rattus norvegicus
Smpd3	sphingomyelin phosphodiesterase 3(Smpd3)	Rattus norvegicus
Stim2	stromal interaction molecule 2(Stim2)	Rattus norvegicus
Tmem106b	transmembrane protein 106B(Tmem106b)	Rattus norvegicus
Tap2	transporter 2, ATP binding cassette subfamily B member(Tap2)	Rattus norvegicus
Trim2	tripartite motif-containing 2(Trim2)	Rattus norvegicus
Tppp	tubulin polymerization promoting protein(Tppp)	Rattus norvegicus
Tubg1	tubulin, gamma 1(Tubg1)	Rattus norvegicus
Vamp8	vesicle-associated membrane protein 8(Vamp8)	Rattus norvegicus
Vdr	vitamin D (1,25- dihydroxyvitamin D3) receptor(Vdr)	Rattus norvegicus

## Sheet: Lipoprotein
UP_KEYWORDS: Lipoprotein
Gene symbol	Gene name	Species
Cd59	CD59 molecule(Cd59)	Rattus norvegicus
Rab10	RAB10, member RAS oncogene family(Rab10)	Rattus norvegicus
Rab15	RAB15, member RAS oncogene family(Rab15)	Rattus norvegicus
Rab3d	RAB3D, member RAS oncogene family(Rab3d)	Rattus norvegicus
Adra1a	adrenoceptor alpha 1A(Adra1a)	Rattus norvegicus
Bace1	beta-secretase 1(Bace1)	Rattus norvegicus
Cpd	carboxypeptidase D(Cpd)	Rattus norvegicus
Drd1	dopamine receptor D1(Drd1)	Rattus norvegicus
Gpc1	glypican 1(Gpc1)	Rattus norvegicus
Hpcal4	hippocalcin-like 4(Hpcal4)	Rattus norvegicus
Inpp5e	inositol polyphosphate-5-phosphatase E(Inpp5e)	Rattus norvegicus
Ncald	neurocalcin delta(Ncald)	Rattus norvegicus
Ptgir	prostaglandin I2 (prostacyclin) receptor (IP)(Ptgir)	Rattus norvegicus
Prkaca	protein kinase cAMP-activated catalytic subunit alpha(Prkaca)	Rattus norvegicus
Ppm1b	protein phosphatase, Mg2+/Mn2+ dependent, 1B(Ppm1b)	Rattus norvegicus
Rho	rhodopsin(Rho)	Rattus norvegicus
Slc1a2	solute carrier family 1 member 2(Slc1a2)	Rattus norvegicus
Smpd3	sphingomyelin phosphodiesterase 3(Smpd3)	Rattus norvegicus
Tmem106b	transmembrane protein 106B(Tmem106b)	Rattus norvegicus
Vsnl1	visinin-like 1(Vsnl1)	Rattus norvegicus
Zdhhc22	zinc finger, DHHC-type containing 22(Zdhhc22)	Rattus norvegicus

## Sheet: Glycoprotein
UP_KEYWORDS: Glycoprotein
Gene symbol	Gene name	Species
Cd59	CD59 molecule(Cd59)	Rattus norvegicus
Cd276	Cd276 molecule(Cd276)	Rattus norvegicus
Gpr160	G protein-coupled receptor 160(Gpr160)	Rattus norvegicus
Sidt1	SID1 transmembrane family, member 1(Sidt1)	Rattus norvegicus
St8sia2	ST8 alpha-N-acetyl-neuraminide alpha-2,8-sialyltransferase 2(St8sia2)	Rattus norvegicus
Tcta	T-cell leukemia translocation altered(Tcta)	Rattus norvegicus
Adra1a	adrenoceptor alpha 1A(Adra1a)	Rattus norvegicus
Acan	aggrecan(Acan)	Rattus norvegicus
Bace1	beta-secretase 1(Bace1)	Rattus norvegicus
Cpd	carboxypeptidase D(Cpd)	Rattus norvegicus
Ceacam1	carcinoembryonic antigen related cell adhesion molecule 1(Ceacam1)	Rattus norvegicus
Ctsc	cathepsin C(Ctsc)	Rattus norvegicus
Ctss	cathepsin S(Ctss)	Rattus norvegicus
Chrnb2	cholinergic receptor nicotinic beta 2 subunit(Chrnb2)	Rattus norvegicus
Ccdc47	coiled-coil domain containing 47(Ccdc47)	Rattus norvegicus
Cntnap1	contactin associated protein 1(Cntnap1)	Rattus norvegicus
Cnga1	cyclic nucleotide gated channel alpha 1(Cnga1)	Rattus norvegicus
Cnnm4	cyclin and CBS domain divalent metal cation transport mediator 4(Cnnm4)	Rattus norvegicus
Dagla	diacylglycerol lipase, alpha(Dagla)	Rattus norvegicus
Drd1	dopamine receptor D1(Drd1)	Rattus norvegicus
Epo	erythropoietin(Epo)	Rattus norvegicus
Fgf5	fibroblast growth factor 5(Fgf5)	Rattus norvegicus
Fmod	fibromodulin(Fmod)	Rattus norvegicus
Flrt2	fibronectin leucine rich transmembrane protein 2(Flrt2)	Rattus norvegicus
Gabra5	gamma-aminobutyric acid type A receptor alpha 5 subunit(Gabra5)	Rattus norvegicus
Gldn	gliomedin(Gldn)	Rattus norvegicus
Glp1r	glucagon-like peptide 1 receptor(Glp1r)	Rattus norvegicus
Gpc1	glypican 1(Gpc1)	Rattus norvegicus
Hcn3	hyperpolarization-activated cyclic nucleotide-gated potassium channel 3(Hcn3)	Rattus norvegicus
Igf1r	insulin-like growth factor 1 receptor(Igf1r)	Rattus norvegicus
Itga7	integrin subunit alpha 7(Itga7)	Rattus norvegicus
Masp1	mannan-binding lectin serine peptidase 1(Masp1)	Rattus norvegicus
Metap2	methionyl aminopeptidase 2(Metap2)	Rattus norvegicus
Npr1	natriuretic peptide receptor 1(Npr1)	Rattus norvegicus
Ntn1	netrin 1(Ntn1)	Rattus norvegicus
Ntrk3	neurotrophic receptor tyrosine kinase 3(Ntrk3)	Rattus norvegicus
Notch2	notch 2(Notch2)	Rattus norvegicus
Podxl	podocalyxin-like(Podxl)	Rattus norvegicus
Pgap1	post-GPI attachment to proteins 1(Pgap1)	Rattus norvegicus
Ptgir	prostaglandin I2 (prostacyclin) receptor (IP)(Ptgir)	Rattus norvegicus
Rho	rhodopsin(Rho)	Rattus norvegicus
Sema5a	semaphorin 5A(Sema5a)	Rattus norvegicus
Scn4b	sodium voltage-gated channel beta subunit 4(Scn4b)	Rattus norvegicus
Slc1a2	solute carrier family 1 member 2(Slc1a2)	Rattus norvegicus
Slc22a3	solute carrier family 22 member 3(Slc22a3)	Rattus norvegicus
Sorbs1	sorbin and SH3 domain containing 1(Sorbs1)	Rattus norvegicus
Tmem106b	transmembrane protein 106B(Tmem106b)	Rattus norvegicus
Tmem39b	transmembrane protein 39b(Tmem39b)	Rattus norvegicus
Tnfsf15	tumor necrosis factor superfamily member 15(Tnfsf15)	Rattus norvegicus
Unc5a	unc-5 netrin receptor A(Unc5a)	Rattus norvegicus

## Sheet: Neurogenesis
UP_KEYWORDS: Neurogenesis
Gene symbol	Gene name	Species
Epha8	Eph receptor A8(Epha8)	Rattus norvegicus
Rapgef2	Rap guanine nucleotide exchange factor 2(Rapgef2)	Rattus norvegicus
Dcx	doublecortin(Dcx)	Rattus norvegicus
Gldn	gliomedin(Gldn)	Rattus norvegicus
Gas7	growth arrest specific 7(Gas7)	Rattus norvegicus
Mef2d	myocyte enhancer factor 2D(Mef2d)	Rattus norvegicus
Ntrk3	neurotrophic receptor tyrosine kinase 3(Ntrk3)	Rattus norvegicus
Sema5a	semaphorin 5A(Sema5a)	Rattus norvegicus
Sirt2	sirtuin 2(Sirt2)	Rattus norvegicus

## Sheet: Nucleotide-binding
UP_KEYWORDS: Nucleotide-binding
Gene symbol	Gene name	Species
Abca9	ATP binding cassette subfamily A member 9(Abca9)	Rattus norvegicus
Atp10a	ATPase phospholipid transporting 10A (putative)(Atp10a)	Rattus norvegicus
Ddx11	DEAD/H-box helicase 11(Ddx11)	Rattus norvegicus
Diras1	DIRAS family GTPase 1(Diras1)	Rattus norvegicus
Epha8	Eph receptor A8(Epha8)	Rattus norvegicus
Gnat1	G protein subunit alpha transducin 1(Gnat1)	Rattus norvegicus
Mknk2	MAP kinase-interacting serine/threonine kinase 2(Mknk2)	Rattus norvegicus
Rab10	RAB10, member RAS oncogene family(Rab10)	Rattus norvegicus
Rab15	RAB15, member RAS oncogene family(Rab15)	Rattus norvegicus
Rab3d	RAB3D, member RAS oncogene family(Rab3d)	Rattus norvegicus
Rit1	Ras-like without CAAX 1(Rit1)	Rattus norvegicus
Slk	STE20-like kinase(Slk)	Rattus norvegicus
Cnga1	cyclic nucleotide gated channel alpha 1(Cnga1)	Rattus norvegicus
Dcakd	dephospho-CoA kinase domain containing(Dcakd)	Rattus norvegicus
Dclk3	doublecortin-like kinase 3(Dclk3)	Rattus norvegicus
Hk2	hexokinase 2(Hk2)	Rattus norvegicus
Hipk1	homeodomain interacting protein kinase 1(Hipk1)	Rattus norvegicus
Hcn3	hyperpolarization-activated cyclic nucleotide-gated potassium channel 3(Hcn3)	Rattus norvegicus
Igf1r	insulin-like growth factor 1 receptor(Igf1r)	Rattus norvegicus
Kif1a	kinesin family member 1A(Kif1a)	Rattus norvegicus
Kif24	kinesin family member 24(Kif24)	Rattus norvegicus
Kif9	kinesin family member 9(Kif9)	Rattus norvegicus
Map3k10	mitogen activated protein kinase kinase kinase 10(Map3k10)	Rattus norvegicus
Myo1c	myosin 1C(Myo1c)	Rattus norvegicus
Npr1	natriuretic peptide receptor 1(Npr1)	Rattus norvegicus
Ntrk3	neurotrophic receptor tyrosine kinase 3(Ntrk3)	Rattus norvegicus
Nolc1	nucleolar and coiled-body phosphoprotein 1(Nolc1)	Rattus norvegicus
Pi4kb	phosphatidylinositol 4-kinase beta(Pi4kb)	Rattus norvegicus
Prkaca	protein kinase cAMP-activated catalytic subunit alpha(Prkaca)	Rattus norvegicus
Stk24	serine/threonine kinase 24(Stk24)	Rattus norvegicus
Tap2	transporter 2, ATP binding cassette subfamily B member(Tap2)	Rattus norvegicus
Tubg1	tubulin, gamma 1(Tubg1)	Rattus norvegicus
Ube2g1	ubiquitin-conjugating enzyme E2G 1(Ube2g1)	Rattus norvegicus
Ube2r2	ubiquitin-conjugating enzyme E2R 2(Ube2r2)	Rattus norvegicus

## Sheet: Full_target list
Gene stable ID	Gene name
ENSRNOG00000033372	Klhl24
ENSRNOG00000004588	Zbed4
ENSRNOG00000052232	Cyb561d1
ENSRNOG00000014187	Igf1r
ENSRNOG00000047712	Dcx
ENSRNOG00000013867	Fgf1
ENSRNOG00000005362	Rab3ip
ENSRNOG00000015541	Gnb3
ENSRNOG00000029938	Pik3c2b
ENSRNOG00000016286	Iyd
ENSRNOG00000009385	Pik3cg
ENSRNOG00000002312	Atp10d
ENSRNOG00000023521	Map3k10
ENSRNOG00000021128	Kcnj11
ENSRNOG00000006735	Cdkn2b
ENSRNOG00000049361	Gas7
ENSRNOG00000016433	Prrc1
ENSRNOG00000058202	Ppp2r2c
ENSRNOG00000009761	Tmod1
ENSRNOG00000037618	Kncn
ENSRNOG00000060615	Rai1
ENSRNOG00000019109	Thap11
ENSRNOG00000020277	Cntnap1
ENSRNOG00000025742	Lmnb2
ENSRNOG00000004072	Myo1c
ENSRNOG00000016703	Gtf2a1l
ENSRNOG00000022402	Luzp1
ENSRNOG00000017132	Snx30
ENSRNOG00000018416	Ttbk1
ENSRNOG00000005257	Prkaca
ENSRNOG00000011511	Stk24
ENSRNOG00000018367	Taldo1
ENSRNOG00000012748	Vamp8
ENSRNOG00000023993	Kif1a
ENSRNOG00000010534	Ankrd50
ENSRNOG00000010124	Trim2
ENSRNOG00000000886	Caln1
ENSRNOG00000033608	Cd276
ENSRNOG00000011751	Ncdn
ENSRNOG00000005479	Slc1a2
ENSRNOG00000008639	Pabpc1
ENSRNOG00000005762	Rab22a
ENSRNOG00000010041	Ube2g1
ENSRNOG00000003721	Paqr4
ENSRNOG00000001691	Cldn14
ENSRNOG00000001686	Hlcs
ENSRNOG00000023746	Tmem39b
ENSRNOG00000015708	E2f4
ENSRNOG00000014819	Hap1
ENSRNOG00000016889	Fancc
ENSRNOG00000007905	Itga7
ENSRNOG00000058423	Pnma5
ENSRNOG00000012830	Paqr8
ENSRNOG00000012488	Rab2b
ENSRNOG00000031544	Larp1
ENSRNOG00000021153	Fkbp2
ENSRNOG00000005964	Nr4a3
ENSRNOG00000007117	Cluap1
ENSRNOG00000000522	Cpne5
ENSRNOG00000004566	Arhgef15
ENSRNOG00000003720	Prrx1
ENSRNOG00000010665	Ccr7
ENSRNOG00000042821	Cd59
ENSRNOG00000046257	Ctdspl
ENSRNOG00000010244	Sarm1
ENSRNOG00000059043	Itch
ENSRNOG00000053881	Baz2a
ENSRNOG00000013763	Erlin2
ENSRNOG00000008195	Ywhaz
ENSRNOG00000002636	Abat
ENSRNOG00000006911	Sptb
ENSRNOG00000021682	Dcakd
ENSRNOG00000016212	Ankfy1
ENSRNOG00000006116	Hk2
ENSRNOG00000022922	Slc25a12
ENSRNOG00000020444	Hcn3
ENSRNOG00000015583	Dnal4
ENSRNOG00000029830	Adm2
ENSRNOG00000056476	Slc22a13
ENSRNOG00000011582	Rab3d
ENSRNOG00000019533	Klhl3
ENSRNOG00000013519	Tll2
ENSRNOG00000020193	Runx2
ENSRNOG00000058050	Bclaf1
ENSRNOG00000008930	Tnfsf15
ENSRNOG00000012735	Kif24
ENSRNOG00000020353	Sh3pxd2a
ENSRNOG00000057760	Stil
ENSRNOG00000011009	Cmtm4
ENSRNOG00000006628	Dusp16
ENSRNOG00000005352	Elf4
ENSRNOG00000005600	Nr4a2
ENSRNOG00000022631	Fgf5
ENSRNOG00000003616	Grem2
ENSRNOG00000017488	Snx24
ENSRNOG00000019400	Dag1
ENSRNOG00000015310	Lrrc32
ENSRNOG00000020480	Fads1
ENSRNOG00000049749	Med22
ENSRNOG00000013290	Nrip3
ENSRNOG00000005148	Scrt2
ENSRNOG00000000697	Coro1c
ENSRNOG00000058842	Sptbn2
ENSRNOG00000000599	Lama4
ENSRNOG00000000127	Kpna6
ENSRNOG00000033169	Cpeb4
ENSRNOG00000024497	U2af1l4
ENSRNOG00000014721	Ahrr
ENSRNOG00000020232	Rit1
ENSRNOG00000006206	Tmem106b
ENSRNOG00000022852	Snx22
ENSRNOG00000003510	Fmo2
ENSRNOG00000011171	Rims3
ENSRNOG00000015318	Heyl
ENSRNOG00000007200	Ikzf3
ENSRNOG00000009819	Vezf1
ENSRNOG00000001662	Dyrk1a
ENSRNOG00000005159	Fam135b
ENSRNOG00000002956	Stim2
ENSRNOG00000033026	Dclk3
ENSRNOG00000021881	Metap2
ENSRNOG00000020503	Cbln3
ENSRNOG00000008425	Nav1
ENSRNOG00000010457	Vash1
ENSRNOG00000015226	Man1a2
ENSRNOG00000014678	Fzd5
ENSRNOG00000001254	Col6a2
ENSRNOG00000015191	Phc1
ENSRNOG00000015886	Cnnm4
ENSRNOG00000005984	Etv6
ENSRNOG00000028594	Ifnar1
ENSRNOG00000001781	Lmln
ENSRNOG00000001192	Gltp
ENSRNOG00000002851	Fam104a
ENSRNOG00000001793	Heg1
ENSRNOG00000016102	Ebf3
ENSRNOG00000025679	Stk40
ENSRNOG00000010655	Mttp
ENSRNOG00000055157	Pard6g
ENSRNOG00000006553	Bnc2
ENSRNOG00000000718	Cggbp1
ENSRNOG00000050983	Hpcal4
ENSRNOG00000018704	Nolc1
ENSRNOG00000054420	Vdr
ENSRNOG00000020102	Sirt2
ENSRNOG00000012428	Maf
ENSRNOG00000010452	Cycs
ENSRNOG00000000060	Cplx1
ENSRNOG00000013257	Hecw2
ENSRNOG00000016284	Dmrt3
ENSRNOG00000019024	Trim67
ENSRNOG00000031233	Mapk12
ENSRNOG00000056228	Atp10a
ENSRNOG00000028417	Neurod2
ENSRNOG00000008758	Tspan18
ENSRNOG00000013036	Epha8
ENSRNOG00000003183	Fmod
ENSRNOG00000013554	Treml2
ENSRNOG00000023688	Drd1
ENSRNOG00000027867	Rexo4
ENSRNOG00000013922	Dok2
ENSRNOG00000053210	Zc3h11a
ENSRNOG00000001886	Dgcr8
ENSRNOG00000001412	Epo
ENSRNOG00000020891	Kif9
ENSRNOG00000055650	Pou2f2
ENSRNOG00000030667	Ppm1b
ENSRNOG00000001827	Masp1
ENSRNOG00000024082	Gldn
ENSRNOG00000009522	Adra1a
ENSRNOG00000004709	Foxn3
ENSRNOG00000000257	Smpd3
ENSRNOG00000017589	Gnat1
ENSRNOG00000015713	Parva
ENSRNOG00000006329	Peli1
ENSRNOG00000007164	Cln6
ENSRNOG00000004306	Zbtb39
ENSRNOG00000011285	Zdhhc22
ENSRNOG00000004132	Lasp1
ENSRNOG00000048237	Tcta
ENSRNOG00000024114	Zdbf2
ENSRNOG00000023551	Sp6
ENSRNOG00000027988	Zhx3
ENSRNOG00000000653	Nr5a2
ENSRNOG00000020027	Arhgef2
ENSRNOG00000038406	Tmem132b
ENSRNOG00000000455	Tap2
ENSRNOG00000010803	Gabra5
ENSRNOG00000008196	Parp12
ENSRNOG00000010342	Zfand1
ENSRNOG00000005345	Vsnl1
ENSRNOG00000052887	Dnajc6
ENSRNOG00000010625	Dnmt3b
ENSRNOG00000022975	Nfam1
ENSRNOG00000021024	Pi4kb
ENSRNOG00000016781	Ppib
ENSRNOG00000019332	Gtpbp2
ENSRNOG00000012495	Podxl
ENSRNOG00000003732	Flrt2
ENSRNOG00000024508	Lpal2
ENSRNOG00000020213	Tubg1
ENSRNOG00000002989	Nmt1
ENSRNOG00000030213	Vps13c
ENSRNOG00000008338	Bsdc1
ENSRNOG00000005271	Rapgef5
ENSRNOG00000009613	Sh3bgrl2
ENSRNOG00000022720	Usp37
ENSRNOG00000033202	Fbxo41
ENSRNOG00000025669	Tmem104
ENSRNOG00000011977	Sema5a
ENSRNOG00000025815	Cdr2l
ENSRNOG00000016719	Zfp161
ENSRNOG00000021891	Zdhhc8
ENSRNOG00000002203	Lin54
ENSRNOG00000047088	Rab10
ENSRNOG00000051528	Ddx11
ENSRNOG00000015525	Zswim3
ENSRNOG00000055925	Zc3h7b
ENSRNOG00000003873	Cpd
ENSRNOG00000019639	Pgpep1
ENSRNOG00000047013	Prrg3
ENSRNOG00000021581	Rapgef2
ENSRNOG00000003947	Ntn1
ENSRNOG00000017953	Gfod2
ENSRNOG00000012929	Wsb1
ENSRNOG00000013388	Pgap1
ENSRNOG00000013805	Tnip2
ENSRNOG00000007684	Zc3h3
ENSRNOG00000028261	Tppp
ENSRNOG00000024022	Ndfip2
ENSRNOG00000001152	Glp1r
ENSRNOG00000059840	Unc5a
ENSRNOG00000018483	Smad1
ENSRNOG00000031778	Mef2d
ENSRNOG00000027430	Ikzf2
ENSRNOG00000051440	Ppp1r12b
ENSRNOG00000022946	Slc22a3
ENSRNOG00000019039	Inpp5e
ENSRNOG00000026704	Drp2
ENSRNOG00000026679	Scn4b
ENSRNOG00000016816	Phf2
ENSRNOG00000007202	Sema3d
ENSRNOG00000056462	Tmf1
ENSRNOG00000005731	Birc3
ENSRNOG00000016543	Trim63
ENSRNOG00000029028	Mknk2
ENSRNOG00000032350	Kcnip4
ENSRNOG00000020322	Asb1
ENSRNOG00000011144	Rho
ENSRNOG00000009487	Gpr160
ENSRNOG00000028100	Pex11g
ENSRNOG00000014684	Npr1
ENSRNOG00000024089	Fndc3b
ENSRNOG00000047598	Ctdsp2
ENSRNOG00000042978	Ncald
ENSRNOG00000016496	Ctsc
ENSRNOG00000016467	Kctd1
ENSRNOG00000005368	Ppp3r2
ENSRNOG00000050534	Gcnt1
ENSRNOG00000023538	Aldh5a1
ENSRNOG00000014689	Zbtb4
ENSRNOG00000016756	Ptgir
ENSRNOG00000009006	Ccdc47
ENSRNOG00000011503	Shb
ENSRNOG00000049873	Ap1s3
ENSRNOG00000021157	Ctss
ENSRNOG00000014234	Hif1an
ENSRNOG00000034230	Fcrl1
ENSRNOG00000016915	Barx1
ENSRNOG00000028992	Acan
ENSRNOG00000022514	Tor2a
ENSRNOG00000004810	Plcb1
ENSRNOG00000012236	Hddc3
ENSRNOG00000004778	Cnga1
ENSRNOG00000027264	Dagla
ENSRNOG00000000565	Sgpl1
ENSRNOG00000014887	Homez
ENSRNOG00000049437	Gpc1
ENSRNOG00000014092	Paip2b
ENSRNOG00000002089	Ccng2
ENSRNOG00000010086	Plagl2
ENSRNOG00000020578	Ceacam1
ENSRNOG00000052572	Aff2
ENSRNOG00000009766	Gpr180
ENSRNOG00000002013	Sidt1
ENSRNOG00000038980	Lypd6
ENSRNOG00000030408	Dnajb12
ENSRNOG00000019333	Hipk1
ENSRNOG00000025079	Fam126b
ENSRNOG00000009145	Klf12
ENSRNOG00000011339	Slk
ENSRNOG00000006770	Brd4
ENSRNOG00000036798	Dusp3
ENSRNOG00000018674	Ntrk3
ENSRNOG00000002397	Slc30a10
ENSRNOG00000005985	Kcnma1
ENSRNOG00000015375	Lsm1
ENSRNOG00000037909	Ppm1f
ENSRNOG00000021463	Ppara
ENSRNOG00000008752	Nrf1
ENSRNOG00000020372	Hdac4
ENSRNOG00000012031	St8sia2
ENSRNOG00000010103	Eif4b
ENSRNOG00000028630	Ksr2
ENSRNOG00000014851	Col4a4
ENSRNOG00000007433	Cyb561
ENSRNOG00000005133	Mapt
ENSRNOG00000015658	Sorbs1
ENSRNOG00000059326	Abca9
ENSRNOG00000014303	Lrp11
ENSRNOG00000015033	Mxd4
ENSRNOG00000010448	Ptbp1
ENSRNOG00000007364	Rab15
ENSRNOG00000016847	Bace1
ENSRNOG00000020778	Chrnb2
ENSRNOG00000024602	Plekha7
ENSRNOG00000017663	Dolpp1
ENSRNOG00000003792	Med14
ENSRNOG00000012358	Pcyt1b
ENSRNOG00000014002	St7l
ENSRNOG00000029738	Diras1
ENSRNOG00000018835	Notch2
ENSRNOG00000046527	Phf20l1
ENSRNOG00000056659	Mecp2
ENSRNOG00000016254	Sema4c
ENSRNOG00000059166	Ldb3
ENSRNOG00000005486	Phf20l1
ENSRNOG00000032828	Mapk8ip2
ENSRNOG00000036719	Samd10
ENSRNOG00000024457	Pde11a
ENSRNOG00000012209	Cdadc1
ENSRNOG00000008901	Coro2a
ENSRNOG00000009617	Exoc7
ENSRNOG00000008436	Krt85
ENSRNOG00000010727	Ube2r2
ENSRNOG00000003310	Tmem63a

## Sheet: Enriched_targets
SYMBOL	RANK IN GENE LIST	RANK METRIC SCORE	RUNNING ES	CORE ENRICHMENT
Pik3cg	189	9916.0	-0.004737045	No
Ctsc	215	9890.0	-6.687443E-4	No
Fmod	230	9875.0	0.0039829034	No
Elf4	262	9842.0	0.007702267	No
Ctss	311	9791.0	0.010479493	No
Col6a2	345	9757.0	0.01404478	No
Hk2	346	9756.0	0.01938419	No
Gcnt1	438	9663.0	0.019778915	No
Wsb1	446	9655.0	0.024686603	No
Notch2	611	9486.0	0.021058667	No
Npr1	630	9467.0	0.02527191	No
Pabpc1	680	9416.0	0.027790122	No
Gpr160	717	9379.0	0.030987198	No
Maf	733	9363.0	0.03530485	No
Gltp	787	9307.0	0.0375483	No
Hpcal4	790	9304.0	0.042532776	No
Tspan18	826	9267.0	0.04572233	No
St8sia2	876	9216.0	0.048131086	No
Nfam1	878	9214.0	0.053120088	No
Gabra5	917	9172.0	0.056096315	No
Hap1	935	9154.0	0.06019203	No
Vamp8	1026	9063.0	0.060312156	No
Sema3d	1037	9051.0	0.06472795	No
Sgpl1	1072	9016.0	0.06783391	No
Taldo1	1167	8916.0	0.06765847	No
Lrrc32	1234	8847.0	0.06895105	No
Itga7	1352	8725.0	0.067434184	No
Tnip2	1431	8640.0	0.06796814	No
Podxl	1460	8610.0	0.07117456	No
Abca9	1469	8600.0	0.075451076	No
Foxn3	1485	8584.0	0.07934239	No
Pgap1	1488	8581.0	0.08393117	No
Parp12	1490	8578.0	0.08857209	No
Ccng2	1499	8569.0	0.09283164	No
Gas7	1579	8486.0	0.093227535	No
Vdr	1589	8476.0	0.097382404	No
Prrx1	1705	8355.0	0.0957706	No
Lama4	1780	8278.0	0.09632154	No
Pard6g	1841	8214.0	0.09759035	No
Dcx	1892	8160.0	0.09936738	No
Tnfsf15	1933	8118.0	0.10165921	No
Cd59	2015	8030.0	0.101697974	No
Ikzf2	2139	7901.0	0.09940747	No
Runx2	2232	7801.0	0.09872936	No
Ankfy1	2378	7648.0	0.09511727	No
Fndc3b	2409	7616.0	0.097672135	No
Tap2	2592	7418.0	0.09194439	No
Sorbs1	2697	7308.0	0.09035112	No
Ceacam1	2713	7290.0	0.09353423	No
Ddx11	2749	7253.0	0.09562154	No
Treml2	2803	7194.0	0.09670855	No
Arhgef2	2899	7092.0	0.09548107	No
Zc3h11a	2906	7084.0	0.099035434	No
Ptbp1	2990	6997.0	0.09840129	No
Dag1	3039	6947.0	0.09962202	No
Peli1	3088	6896.0	0.10081483	No
Cd276	3108	6874.0	0.10355515	No
Mxd4	3111	6871.0	0.10720806	No
Cggbp1	3122	6860.0	0.11042472	No
Hipk1	3212	6764.0	0.10934039	No
Pik3c2b	3274	6700.0	0.10972682	No
Nr4a3	3305	6667.0	0.1117623	No
Ctdsp2	3314	6656.0	0.11497487	No
Nr4a2	3386	6578.0	0.11475675	No
Fads1	3440	6523.0	0.11547653	No
Snx24	3444	6518.0	0.11888246	No
Lypd6	3490	6465.0	0.12000071	No
Cpd	3491	6464.0	0.123538435	No
Gnb3	3492	6463.0	0.1270756	No
Zdbf2	3589	6357.0	0.12539208	No
Pgpep1	3736	6199.0	0.12093318	No
Snx22	3744	6190.0	0.1239445	No
Eif4b	3827	6102.0	0.122874305	No
Birc3	3907	6015.0	0.12191783	No
Phf2	3927	5994.0	0.12417653	No
Nrf1	3928	5993.0	0.12745647	No
Drp2	3941	5979.0	0.13008341	No
Vezf1	4021	5892.0	0.12905963	No
Hddc3	4033	5880.0	0.13168617	No
Phc1	4129	5778.0	0.12973954	No
Trim63	4168	5738.0	0.13083635	No
Atp10a	4204	5702.0	0.1320748	No
Sema4c	4256	5643.0	0.13242051	No
Ppib	4271	5627.0	0.13474725	No
Kif24	4329	5567.0	0.1347287	No
Tmem63a	4351	5543.0	0.13663302	No
Dcakd	4389	5501.0	0.13765392	No
Arhgef15	4455	5426.0	0.13712797	No
Masp1	4457	5421.0	0.14004108	No
Sirt2	4639	5225.0	0.1331669	No
Plagl2	4694	5166.0	0.13309021	No
Gldn	4802	5048.0	0.13009873	No
Vps13c	4884	4964.0	0.1284595	No
Lmnb2	4932	4912.0	0.12862024	No
Ppm1f	5064	4764.0	0.12418265	No
Ctdspl	5089	4737.0	0.12548453	No
Nav1	5103	4723.0	0.12737028	No
Coro1c	5248	4563.0	0.12212357	No
Adra1a	5297	4504.0	0.12200725	No
Usp37	5307	4494.0	0.123982795	No
Cpeb4	5354	4442.0	0.123940095	No
Smad1	5392	4400.0	0.12435841	No
Bclaf1	5482	4306.0	0.121928826	No
Fmo2	5535	4246.0	0.12145619	No
Slc30a10	5544	4234.0	0.123343214	No
Ccdc47	5632	4136.0	0.12092815	No
Dnmt3b	5711	4050.0	0.118950024	No
Ppara	5927	3818.0	0.10947735	No
Metap2	5940	3802.0	0.11091283	No
Dusp3	5950	3791.0	0.11250362	No
Rab3d	5957	3784.0	0.11425192	No
Pex11g	5968	3771.0	0.11577799	No
Stim2	6051	3681.0	0.113382794	No
Dok2	6105	3621.0	0.112514324	No
Fam104a	6182	3533.0	0.110360794	No
Tmem39b	6200	3510.0	0.111367576	No
Tmod1	6221	3489.0	0.112201534	No
Ntrk3	6388	3302.0	0.105081566	No
Rab10	6453	3232.0	0.10340864	No
Ebf3	6457	3228.0	0.105013974	No
Baz2a	6489	3192.0	0.10509383	No
Cmtm4	6657	3000.0	0.0977548	No
Zbtb39	6663	2994.0	0.09912451	No
Ube2r2	6730	2918.0	0.09717218	No
Flrt2	6745	2901.0	0.09800699	No
Rapgef2	7105	2511.0	0.08007498	No
Ntn1	7119	2497.0	0.08074247	No
Tcta	7154	2458.0	0.08025927	No
Slc22a3	7318	2280.0	0.07274131	No
Lin54	7393	2200.0	0.06996579	No
Cldn14	7787	1791.0	0.04981128	No
Ahrr	8091	1480.0	0.034326576	No
Rho	8907	633.0	-0.009155974	No
Bnc2	8965	573.0	-0.0119077135	No
Ptgir	9010	525.0	-0.013986612	No
Glp1r	9113	418.0	-0.019243188	No
Tll2	9191	336.0	-0.023200195	No
Epo	9397	121.0	-0.034158442	No
Gnat1	9512	2.0	-0.040288027	No
Sp6	9848	-342.0	-0.058116447	No
Adm2	9875	-369.0	-0.05931272	No
Slc22a13	9982	-483.0	-0.06474883	No
Iyd	10334	-843.0	-0.08316351	No
Ccr7	10485	-999.0	-0.090683445	No
Ikzf3	10580	-1098.0	-0.09513763	No
Cbln3	10655	-1176.0	-0.09847358	No
Cnga1	10873	-1405.0	-0.109374434	No
Mttp	10921	-1454.0	-0.11110623	No
Dmrt3	11049	-1586.0	-0.117068015	No
St7l	11482	-2044.0	-0.13918139	No
Col4a4	11605	-2176.0	-0.14455138	No
Gtpbp2	11618	-2194.0	-0.14399596	No
Homez	11630	-2208.0	-0.14337908	No
Vash1	11670	-2249.0	-0.14424555	No
Med22	11823	-2407.0	-0.15110245	No
Bsdc1	11943	-2530.0	-0.15611736	No
Dnajb12	11975	-2564.0	-0.15638122	No
Rit1	11984	-2575.0	-0.15540215	No
Rab22a	12087	-2684.0	-0.15941857	No
Thap11	12151	-2755.0	-0.16129877	No
Paip2b	12204	-2814.0	-0.16255513	No
Caln1	12367	-2984.0	-0.16963403	No
Zbed4	12400	-3017.0	-0.16970374	No
Nmt1	12424	-3041.0	-0.1692763	No
Brd4	12447	-3066.0	-0.1687814	No
Aldh5a1	12514	-3136.0	-0.17061442	No
Fancc	12579	-3207.0	-0.17230104	No
Mknk2	12687	-3321.0	-0.1762377	No
Tmem104	12810	-3451.0	-0.1809099	No
Dusp16	12962	-3609.0	-0.18705517	No
Zswim3	13011	-3659.0	-0.18763396	No
Pi4kb	13143	-3798.0	-0.19260024	No
Aff2	13210	-3870.0	-0.19403155	No
Paqr8	13249	-3910.0	-0.19393519	No
Mecp2	13267	-3928.0	-0.19269963	No
Etv6	13300	-3963.0	-0.1922516	No
Dnal4	13338	-4002.0	-0.1920511	No
Cyb561	13377	-4043.0	-0.19188194	No
Rexo4	13387	-4053.0	-0.19014776	No
Tmem106b	13441	-4108.0	-0.1907497	No
Inpp5e	13481	-4149.0	-0.19057631	No
Gtf2a1l	13626	-4295.0	-0.1959697	No
Snx30	13736	-4407.0	-0.19941956	No
Cln6	13765	-4437.0	-0.198497	No
Tmf1	13981	-4662.0	-0.20750774	No
Rab2b	13984	-4665.0	-0.20506218	No
Mapt	14009	-4690.0	-0.20378603	No
Itch	14025	-4708.0	-0.20201604	No
Tppp	14067	-4750.0	-0.20162128	No
Rai1	14116	-4801.0	-0.20157506	No
Zc3h7b	14157	-4842.0	-0.20107616	No
Slc1a2	14172	-4857.0	-0.19917084	No
Gpr180	14209	-4894.0	-0.19842839	No
Rapgef5	14212	-4897.0	-0.19585584	No
Hlcs	14317	-5004.0	-0.19871007	No
Lsm1	14608	-5299.0	-0.21140555	No
Parva	14614	-5305.0	-0.20877104	No
Cnnm4	14715	-5408.0	-0.21118906	No
Zc3h3	14752	-5445.0	-0.21014504	No
Kif9	14781	-5475.0	-0.20865437	No
Fgf5	14819	-5513.0	-0.20762692	No
Kctd1	14932	-5628.0	-0.21056987	No
Gfod2	15002	-5699.0	-0.21116151	No
Ube2g1	15068	-5766.0	-0.21150137	No
Stil	15130	-5828.0	-0.21159218	No
Nolc1	15220	-5920.0	-0.21313843	Yes
Coro2a	15227	-5927.0	-0.21021728	Yes
Sh3pxd2a	15232	-5932.0	-0.20718585	Yes
Dolpp1	15233	-5933.0	-0.20393874	Yes
Zhx3	15321	-6023.0	-0.20532106	Yes
Hif1an	15349	-6051.0	-0.20346138	Yes
Myo1c	15405	-6108.0	-0.20307629	Yes
Fam135b	15586	-6293.0	-0.20931219	Yes
Slk	15594	-6301.0	-0.20624012	Yes
Cdkn2b	15600	-6307.0	-0.20305721	Yes
Heyl	15613	-6321.0	-0.2002431	Yes
Klf12	15618	-6326.0	-0.19699603	Yes
Ankrd50	15722	-6430.0	-0.19901605	Yes
Larp1	15751	-6459.0	-0.19698684	Yes
Igf1r	15859	-6567.0	-0.19914699	Yes
Sh3bgrl2	15929	-6638.0	-0.19922473	Yes
Kpna6	15989	-6699.0	-0.19873129	Yes
Sptb	16054	-6765.0	-0.19847062	Yes
Abat	16078	-6789.0	-0.19599193	Yes
Ppm1b	16125	-6836.0	-0.19472441	Yes
Asb1	16166	-6877.0	-0.19311178	Yes
Krt85	16206	-6918.0	-0.19142292	Yes
Lasp1	16241	-6953.0	-0.18944603	Yes
Hcn3	16249	-6961.0	-0.18601276	Yes
Rab15	16261	-6973.0	-0.18278803	Yes
Fam126b	16350	-7062.0	-0.18365549	Yes
Lmln	16386	-7098.0	-0.18165301	Yes
Man1a2	16534	-7249.0	-0.18559101	Yes
Cpne5	16548	-7263.0	-0.18231513	Yes
Dgcr8	16606	-7322.0	-0.18137316	Yes
Ap1s3	16739	-7456.0	-0.18439122	Yes
Sarm1	16925	-7642.0	-0.1901577	Yes
Sidt1	16942	-7659.0	-0.18682642	Yes
Tubg1	16945	-7662.0	-0.1827406	Yes
Trim2	16961	-7678.0	-0.17934513	Yes
Trim67	17003	-7720.0	-0.1773249	Yes
Samd10	17035	-7753.0	-0.17474885	Yes
Fkbp2	17069	-7787.0	-0.17226173	Yes
Dclk3	17148	-7866.0	-0.17215139	Yes
Prkaca	17171	-7889.0	-0.16901688	Yes
Stk24	17229	-7948.0	-0.16773233	Yes
Hdac4	17249	-7968.0	-0.16439326	Yes
Hecw2	17268	-7987.0	-0.16099001	Yes
Ndfip2	17315	-8034.0	-0.15906683	Yes
Bace1	17456	-8176.0	-0.16212106	Yes
Shb	17580	-8300.0	-0.16419318	Yes
Rab3ip	17634	-8354.0	-0.16247131	Yes
Zdhhc8	17640	-8360.0	-0.15816481	Yes
Paqr4	17667	-8388.0	-0.15497233	Yes
Klhl3	17697	-8418.0	-0.15192476	Yes
Zdhhc22	17720	-8441.0	-0.14848815	Yes
Zfp161	17744	-8466.0	-0.14509165	Yes
Ppp1r12b	17765	-8487.0	-0.1415223	Yes
Kif1a	17797	-8520.0	-0.13852647	Yes
Zbtb4	17800	-8523.0	-0.13396943	Yes
Fbxo41	17826	-8549.0	-0.13063505	Yes
Unc5a	17852	-8575.0	-0.12728645	Yes
Mef2d	17855	-8578.0	-0.122699305	Yes
Gpc1	17882	-8605.0	-0.11938806	Yes
Cdr2l	17946	-8670.0	-0.11803102	Yes
Pcyt1b	17976	-8700.0	-0.11482911	Yes
Fgf1	18015	-8739.0	-0.11208986	Yes
Ncald	18063	-8787.0	-0.10980833	Yes
Heg1	18120	-8844.0	-0.10797962	Yes
Smpd3	18212	-8936.0	-0.107982785	Yes
Grem2	18291	-9015.0	-0.10724359	Yes
Dnajc6	18351	-9075.0	-0.10544979	Yes
Scn4b	18356	-9081.0	-0.10069491	Yes
Drd1	18362	-9087.0	-0.09599053	Yes
Acan	18389	-9116.0	-0.09239961	Yes
Cplx1	18423	-9150.0	-0.08916654	Yes
Scrt2	18428	-9155.0	-0.084371164	Yes
Epha8	18445	-9172.0	-0.08021182	Yes
Luzp1	18514	-9241.0	-0.07881116	Yes
Kcnj11	18531	-9258.0	-0.07460475	Yes
Dagla	18538	-9265.0	-0.069856726	Yes
Plekha7	18559	-9286.0	-0.0658501	Yes
Diras1	18585	-9312.0	-0.06209814	Yes
Ttbk1	18587	-9314.0	-0.05705441	Yes
Nrip3	18593	-9320.0	-0.052222513	Yes
Chrnb2	18613	-9340.0	-0.048132557	Yes
Kcnip4	18617	-9344.0	-0.043179967	Yes
Ncdn	18708	-9435.0	-0.042856246	Yes
Map3k10	18734	-9461.0	-0.039022736	Yes
Mapk8ip2	18756	-9483.0	-0.034962073	Yes
Sptbn2	18779	-9506.0	-0.0309426	Yes
Slc25a12	18785	-9512.0	-0.026005618	Yes
Cycs	18789	-9516.0	-0.020958893	Yes
Cntnap1	18834	-9561.0	-0.018092433	Yes
Vsnl1	18837	-9564.0	-0.012965658	Yes
Rims3	18843	-9570.0	-0.007996934	Yes
Ppp2r2c	18887	-9614.0	-0.0050476887	Yes
Sema5a	18889	-9616.0	1.6132274E-4	Yes
